# Supplementary material for: Dichotomous ovarian cancer-initiating potential of Pax8+ cells revealed by a mouse genetic mosaic model
Source: PubMed Central journal article supplement — iScience. 2023 Apr 25;26(5):106742. doi: 10.1016/j.isci.2023.106742 (PMC10189502; doi:10.1016/j.isci.2023.106742), 2023-04-25
Supplement: mmc1.pdf [file mmc1.pdf]

iScience, Volume 26

## **Supplemental information**

### **Dichotomous ovarian cancer-initiating potential of Pax8<sup>+</sup> cells revealed by a mouse genetic mosaic model**

**Jianhao Zeng, Astrid Catalina Alvarez-Yela, Eli Casarez, Ying Jiang, Lixin Wang, Brianna E. Kelly, Taylor Jenkins, Eugene Ke, Kristen A. Atkins, Kevin A. Janes, Jill K. Slack-Davis, and Hui Zong**

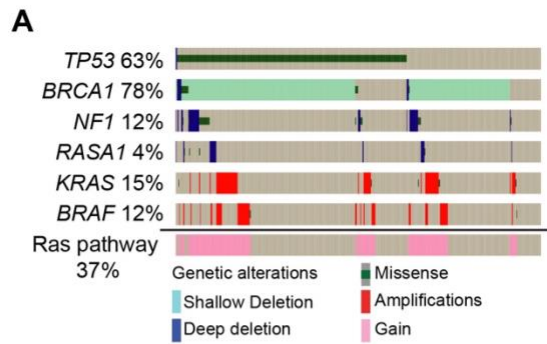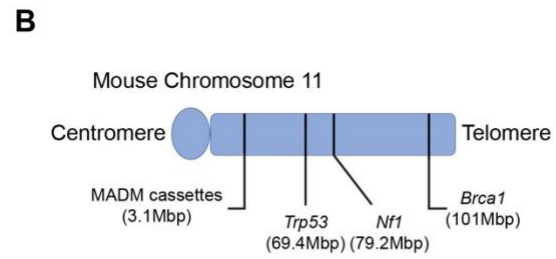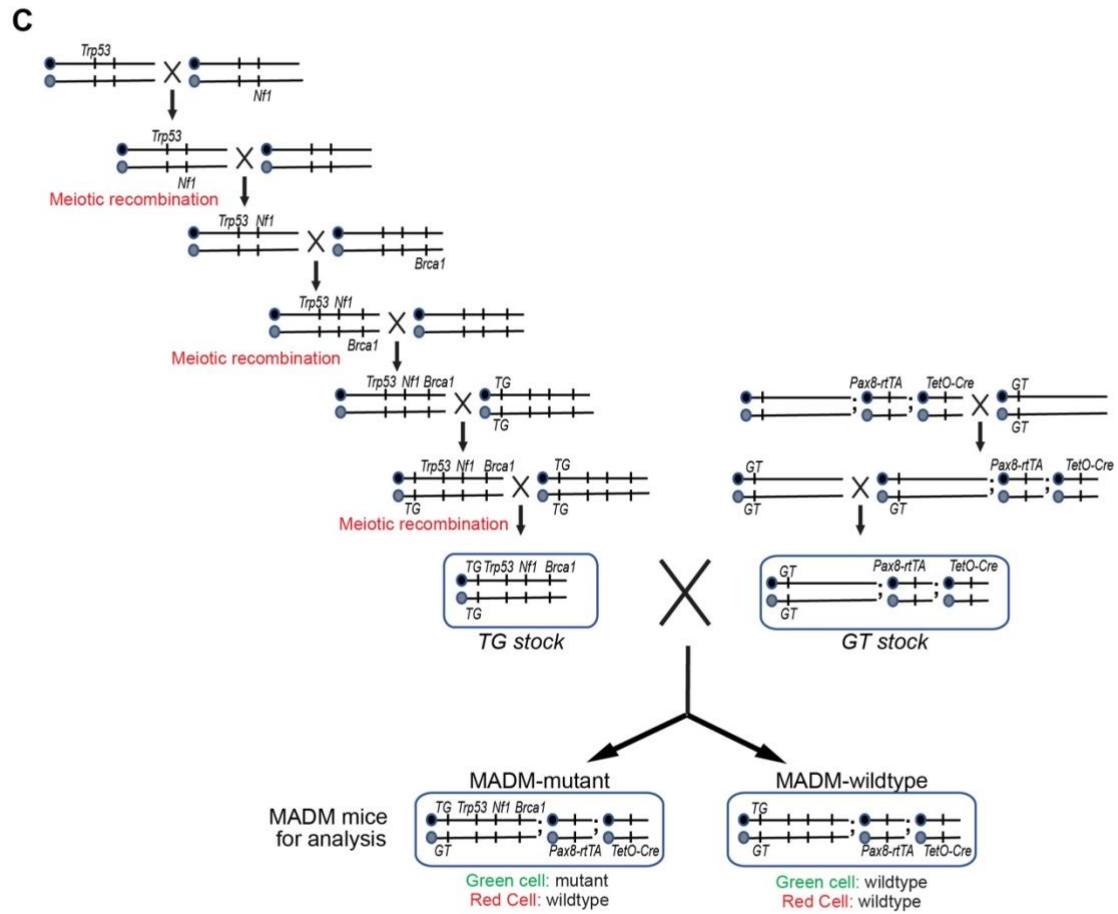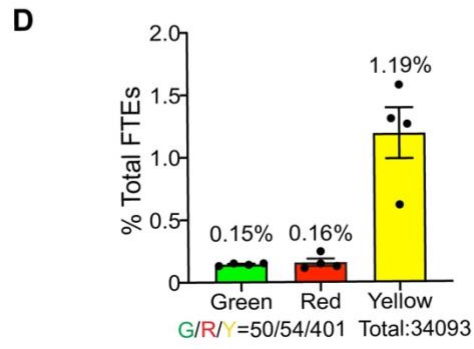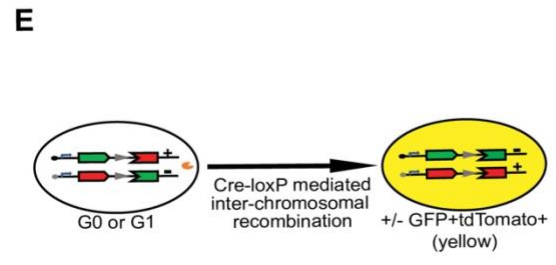

**Figure S1, related to Figure 1: Additional details for establishing a MADM-based mouse model to induce sparse GFP+ mutant cells in the fallopian tube. (A)** *TP53*, *BRCA1*, and *NF1* are among the most frequently mutated genes in HGSOC patients. The mutation spectrum of 531 HGSOC patients from TCGA datasets was assessed. **(B)** *Trp53*, *Nf1*, and *Brca1* genes locate on mouse chromosome 11, where the MADM cassettes have been previously knocked in. The physical locations are indicated. **(C)** The scheme to breed MADM-mutant mice and MADM-wildtype mice. *Trp53*, *Nf1*, and *Brca1* mutations were incorporated into The TG MADM stock line through meiotic recombination. The Cre transgenes (*Pax8-rtTA*, *TetO-Cre*) were incorporated into the GT and TG MADM stock line. We maintain two separate stocks to produce MADM-mutant and MADM-wildtype mice by intercrossing between the stocks. **(D)** The frequency of MADM-labeled cells in fallopian tubes after doxycycline administration (P0-21). Fallopian tubes from four MADM-wildtype mice were sectioned and imaged for quantification. The total fallopian tube epithelial cells (FTEs) were counted by DAPI. Data are represented as mean  $\pm$ SEM. **(E)** Cre-mediated inter-chromosomal recombination occurring in G1 or post-mitotic cells (G0) generates yellow cells only without altering genotype, which explains the higher abundance of yellow cells compared to green and red cells.

**A1**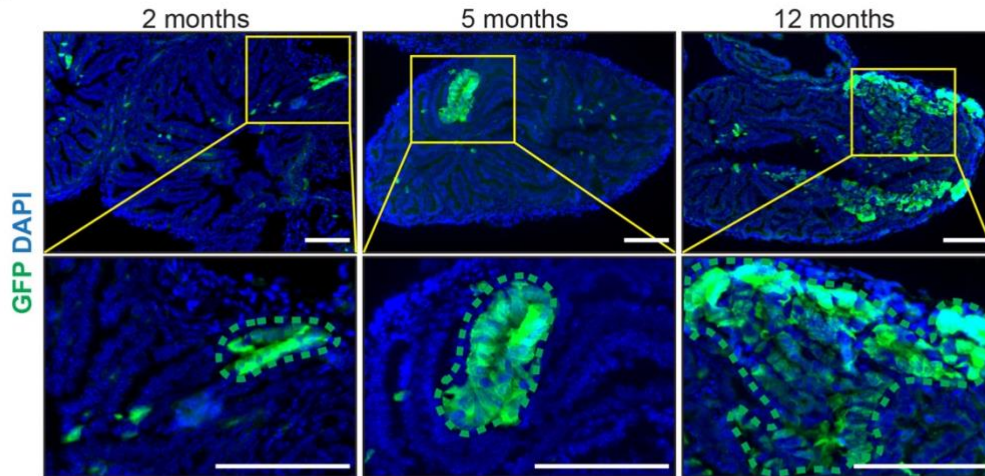**A2**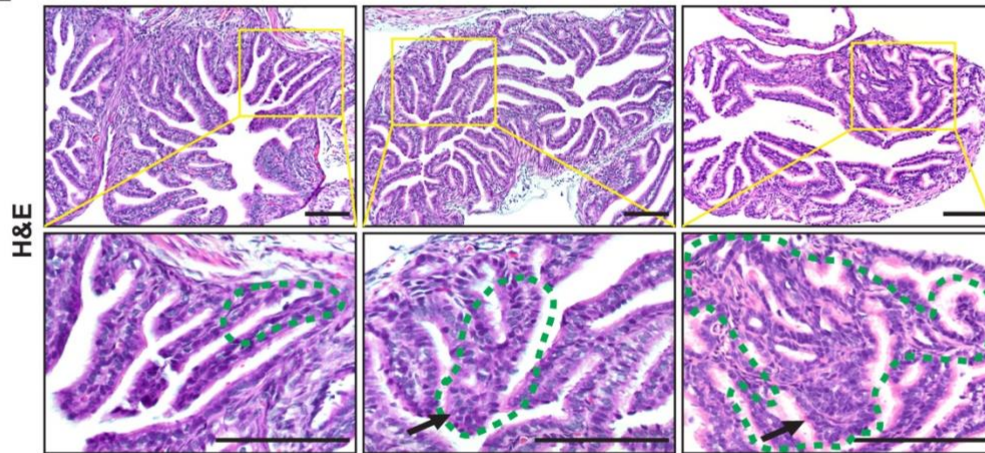**B**

Adjacent sections

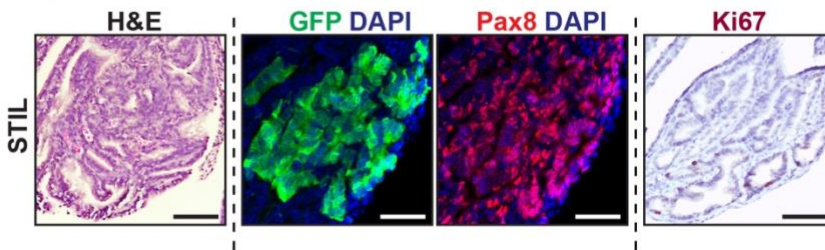**C**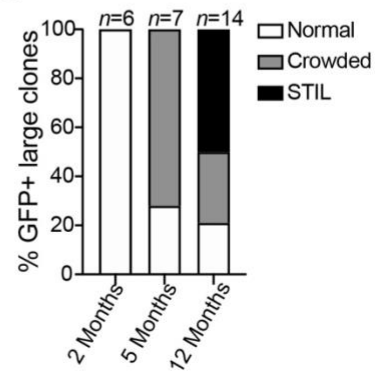

**Figure S2, related to Figure 1: Mutant clones expand and form fallopian tube lesions. (A)** Histologic correlation between clone expansion and progression to fallopian tube lesions. A<sub>1</sub>: Representative immunofluorescence images showing the expansion of mutant clones over time. Fallopian tubes from MADM-mutant mice (6 mice for 2,5 months old, 10 mice for 12 months old) at the indicated ages were harvested for section and fluorescence imaging. The dashed circle indicates a GFP+ mutant clone. A<sub>2</sub>: H&E staining of the same mutant clones (outlined by the dashed circle) showed in A<sub>1</sub> (adjacent slides were used) suggests the gradual formation of fallopian tube lesions. While mutant clones at 2 months ( $n=6$ ) were normal, mutant clones at 5 months ( $n=7$ ) became crowded but remained normal in nuclear morphology, mutant clones at 12 months ( $n=14$ ) demonstrated nuclear crowding with gland formation, nuclear enlargement, a partial loss of cilia, and elevated mitotic figures, compatible with serous tubal intraepithelial lesions (STILs). Scale bar=100  $\mu\text{m}$ . **(B)** The STILs identified were indeed from GFP+ cells and showed a high level of Pax8 and a slightly increased Ki-67 proliferative index. Adjacent sections of 14 mutant clones from six 12-month-old mice were H&E stained and stained for GFP, Pax8+, and Ki67 either by immunofluorescence or immunohistochemistry. Scale bar=50  $\mu\text{m}$ . **(C)** The frequency of “normal,” “crowded,” and “STIL” features among large mutant clones at each indicated ages. 6 clones from six two-month-old mice, 7 from six five-month-old mice, and 14 from ten twelve-month-old mice were assessed.

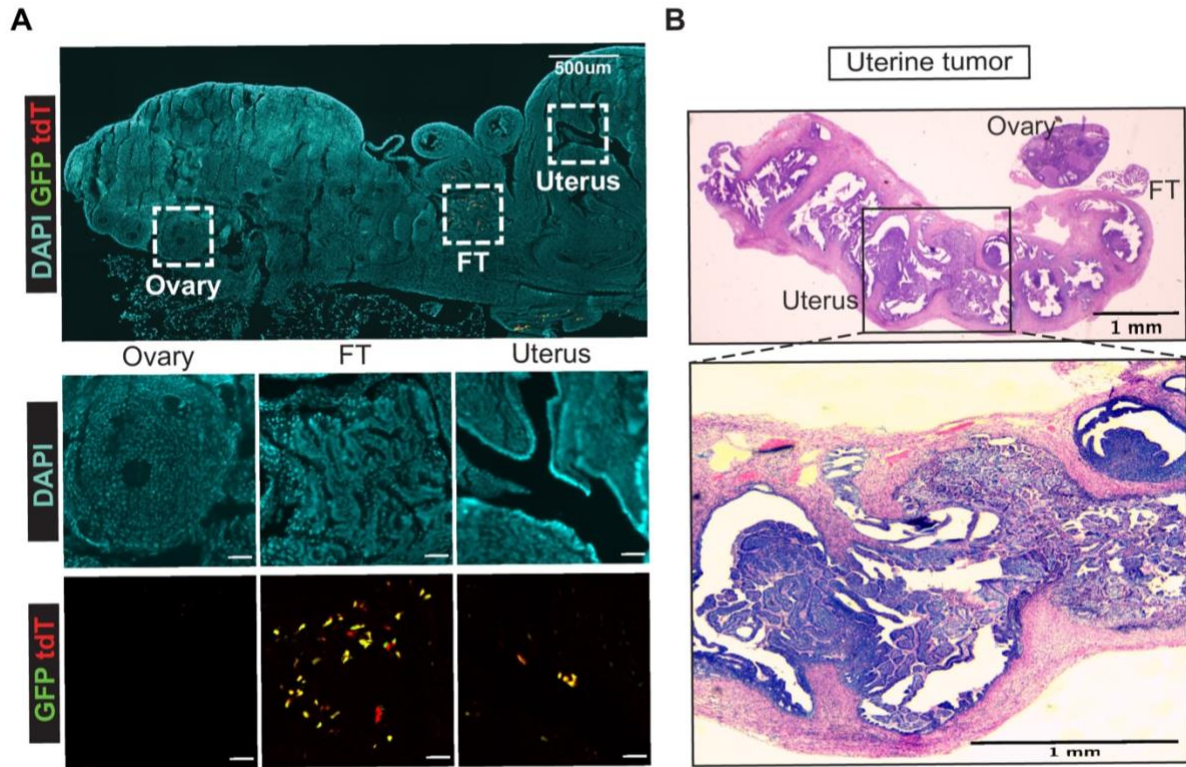

**Figure S3, related to Figure 1: MADM labeling also occurred in the uterus, causing uterine tumor formation.** (A) MADM labeling occurred in the fallopian tube and uterus but not in the ovary. The reproductive tracts, including the ovary, fallopian tube, and uterus from three P21 MADM-wildtype mice right after the end of doxycycline treatment (P0-21,) were harvested and sectioned for DAPI staining and fluorescence imaging. Scale bar = 500  $\mu$ m for the upper panel, 50  $\mu$ m for the middle and lower panels. (B) Formation of uterine tumors. Representative H&E images of the reproductive tract from 8 MADM-mutant mice at around 12 months. Scale bar=1mm.

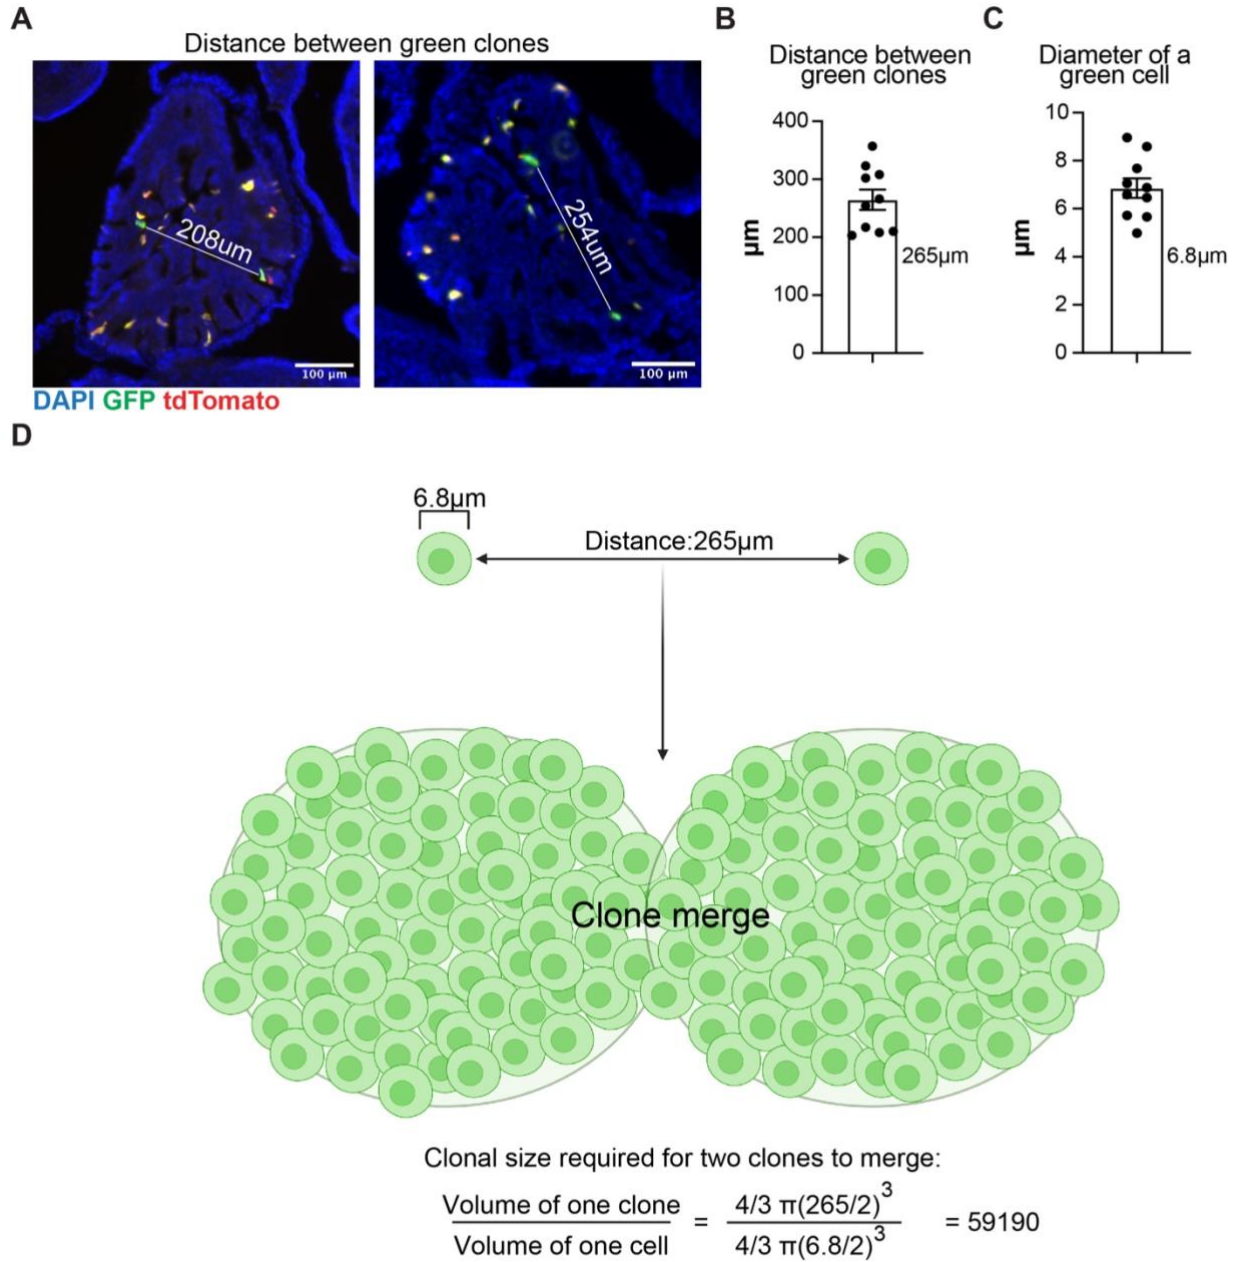

**Figure S4, related to Figure 2: Estimation of the probability for mutant clone merge. (A)** Distance between MADM-labeled GFP+ cells right after the end of doxycycline administration at P21. Representative image of 10 pairs of mutant clones from 4 mice. Scale bar=100 μm. **(B)** The average distance between MADM-labeled GFP+ cells right after Dox administration at P21 is 265 μm. 10 pairs of mutant clones from 4 mice were measured. Data are represented as mean ±SEM. **(C)** The diameter of a GFP+ fallopian tube epithelial cell is about 6.8 μm. 10 GFP+ cells were measured. Data are represented as mean ±SEM. **(D)** The calculation scheme shows the required clonal size (59190 cells) for clones to merge.

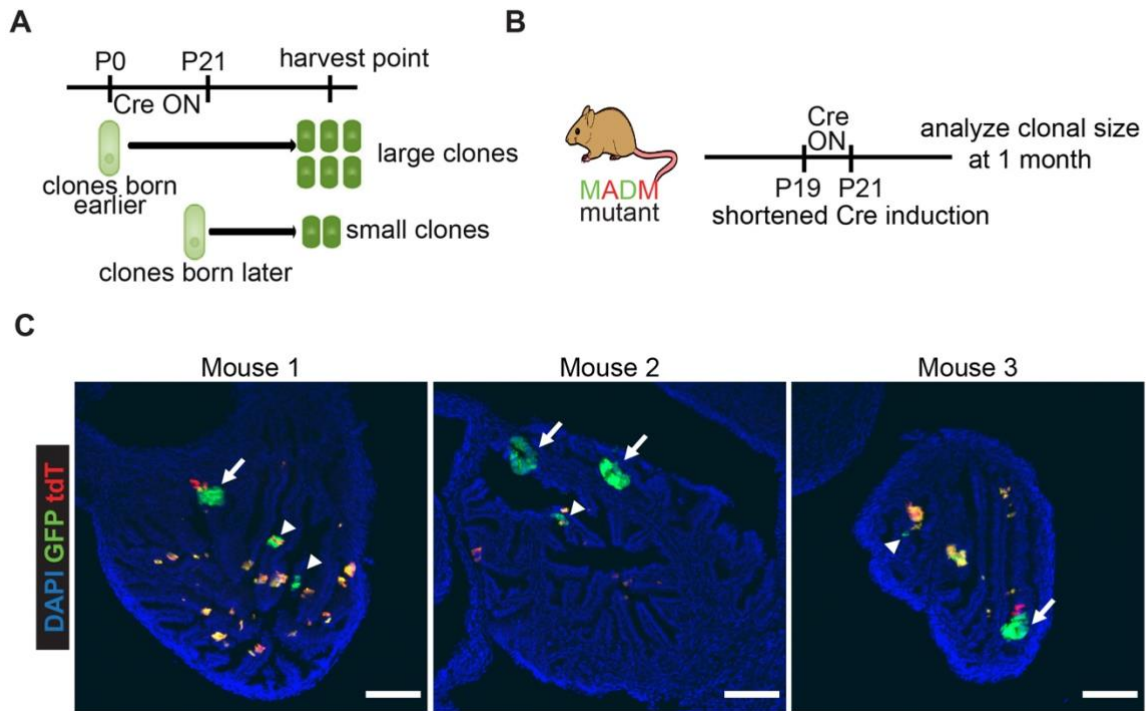

**Figure S5, related to Figure 2: Clonal size heterogeneity is not simply due to unsynchronized clonal age. (A)** The clonal age hypothesis: clones born earlier within the P0-21 range will show larger size at the harvest point, whereas clones born later will show smaller size. **(B)** The scheme of a shortened doxycycline treatment to synchronize the clonal age. **(C)** Heterogeneous size of mutant clones in age-synchronized mice ( $n=3$ ). The arrows indicate expanded clones and the arrowheads indicate non-expanded clones. Scale bar=100 $\mu$ m.



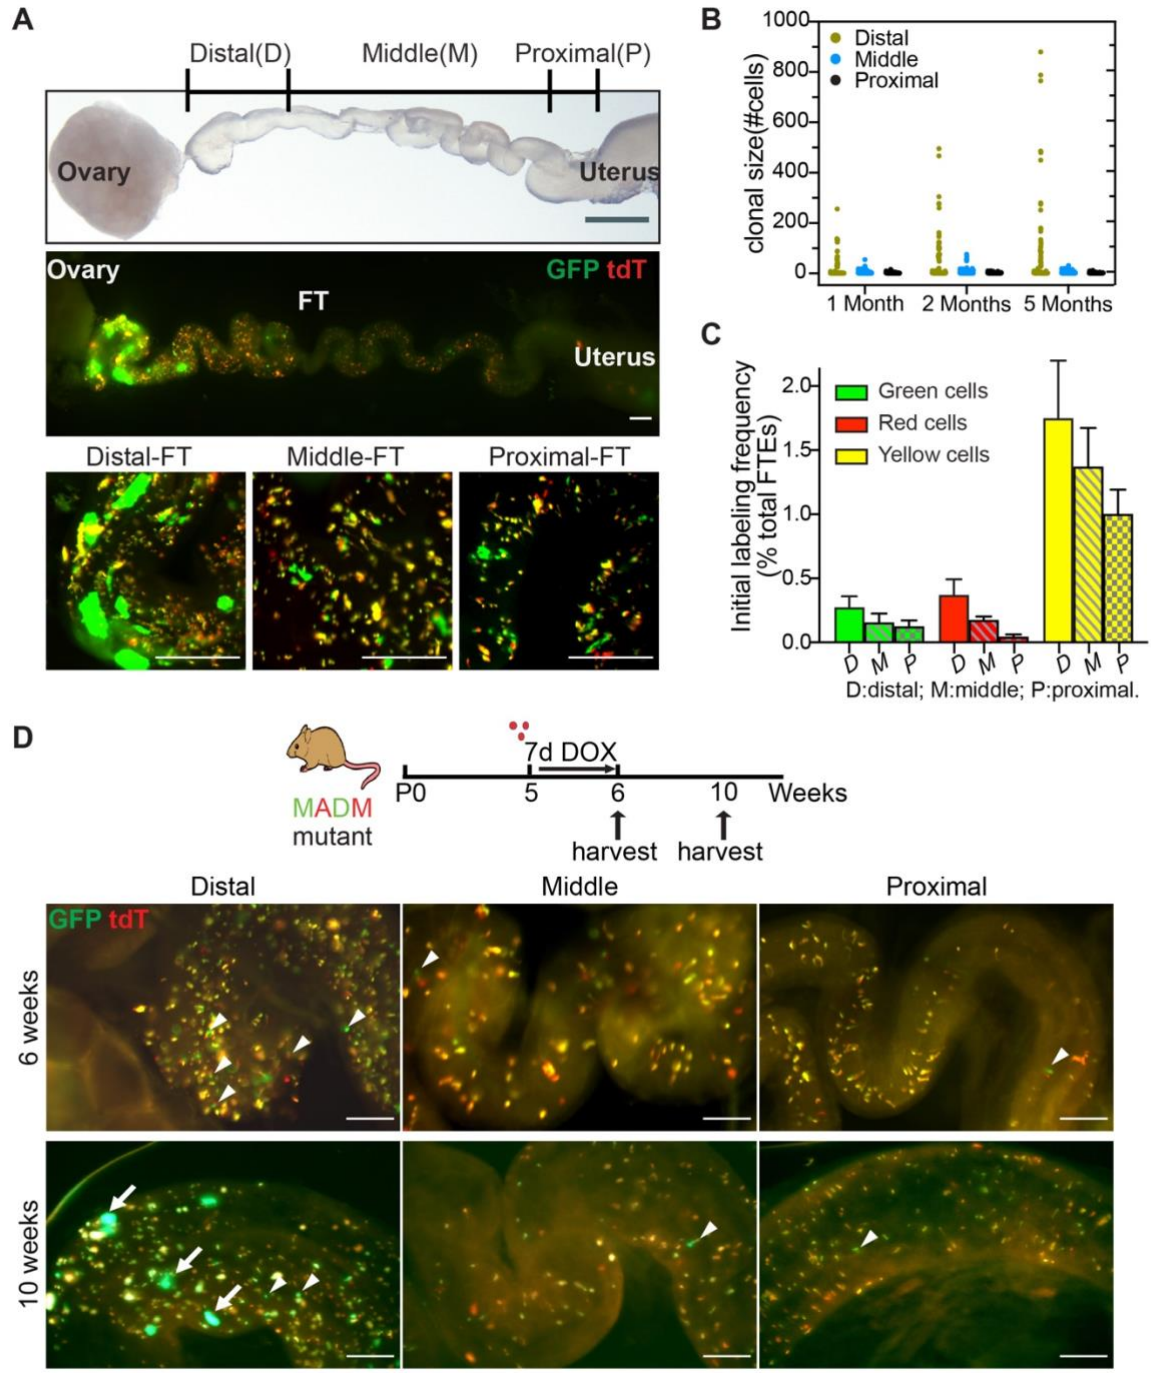

**Figure S6, related to Figure 2: Large clones are spatially enriched in the distal side of the fallopian tube.** **(A)** Large mutant clones are spatially enriched in the distal end of the fallopian tube. Fallopian tubes from two-month-old MADM-mutant mice ( $n=3$ ) were uncoiled and cleared for whole-mount imaging. Scale bar=200 $\mu$ m. **(B)** The clonal size distribution in distal (D), middle (M), and proximal (P) regions of the fallopian tube from MADM-mutant mice at the indicated age ( $n=3$  for each age). **(C)** Initial MADM labeling frequency in distal(D), middle(M), and proximal(P) fallopian tube regions right after P0-21 doxycycline administration was comparable. Fallopian tubes from three MADM-wildtype mice were sectioned and stained for DAPI. The segments of the fallopian tube were discriminated by the morphology and abundance of ductal folds. The frequency of green, red, and yellow cells over the whole epithelium was counted separately for each segment. Data are represented as mean  $\pm$ SEM. **(D)** Dichotomous clonal potential of Pax8+ cells still exists when inducing clones in fully differentiated FTs. Doxycycline was administered to MADM-mutant mice between 5-6 weeks, then FTs were assessed at 6 weeks right after clone induction and 10 weeks ( $n=3$  for each age) through whole-mount imaging after tissue clearing. The arrow indicates expanded GFP+ mutant clones and the arrowhead indicates non-expanded clones. Scale bar=200 $\mu$ m.

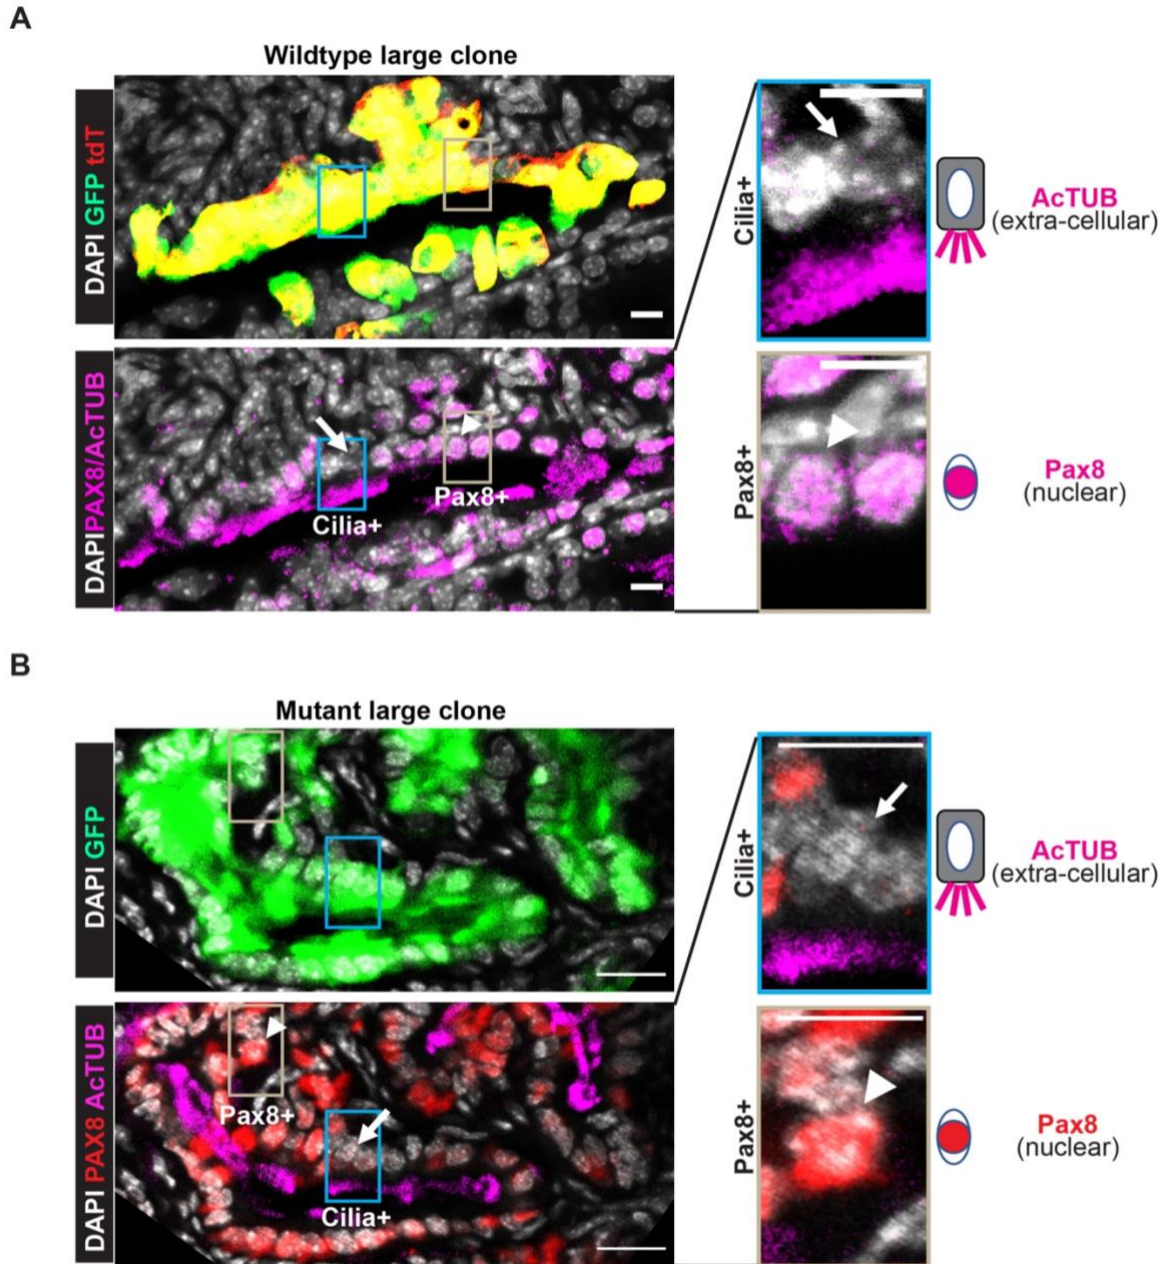

**Figure S7, related to Figure 3: Expanded large clones consist of both ActTUB+ ciliated and Pax8+ cells. (A)** Expanded wildtype clones comprise both ActTUB+ ciliated cells and Pax8+ secretory cells. Fallopian tubes from three 2-month-old MADM-wildtype mice were harvested and sectioned for Pax8 and ActTUB staining. Representative images of a total of 10 clones were shown. Scale bar=20 $\mu$ m. **(B)** Expanded mutant clones comprise both ActTUB+ ciliated cells and Pax8+ secretory cells. Fallopian tubes from three 2-month-old MADM-mutant mice were harvested and sectioned for Pax8 and ActTUB staining. A total of 10 clones were assessed. Scale bar=20 $\mu$ m.

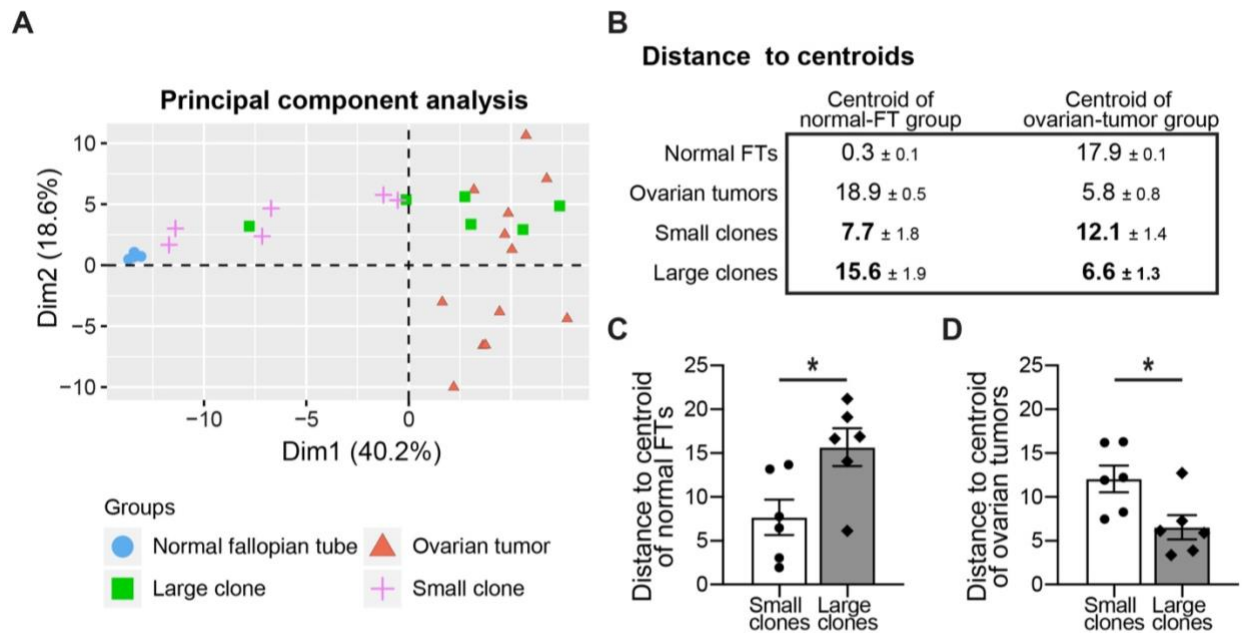

**Figure S8, related to Figure 3: The signature of wildtype large clones is closer to ovarian tumors compared to the small ones.** (A) Principal component analysis of mouse normal fallopian tubes ( $n=4$ ), ovarian tumors ( $n=12$ ), large clones ( $n=6$ ), and small clones ( $n=6$ ), based on the differentially expressed genes (a total of 129) between the small and large clones. (B) Distance between the means of samples (centroids) of each group  $\pm$  SEM, from  $n=4$  (Normal FT), 12 (Ovarian tumor), 6 (Small clone), and 6 (Large clone) samples, showing that small clones are closer to the normal fallopian tube, whereas large clones are closer to the ovarian tumor. (C) Distance of small and large clones (6 each) to the centroids of normal fallopian tubes. Data are represented as mean  $\pm$  SEM. Mann-Whitney  $U$  test was used,  $* < 0.05$ . (D) Distance of small and large clones (6 each) to the centroids of ovarian tumors. Data are represented as mean  $\pm$  SEM. Mann-Whitney test was used,  $* < 0.05$ .

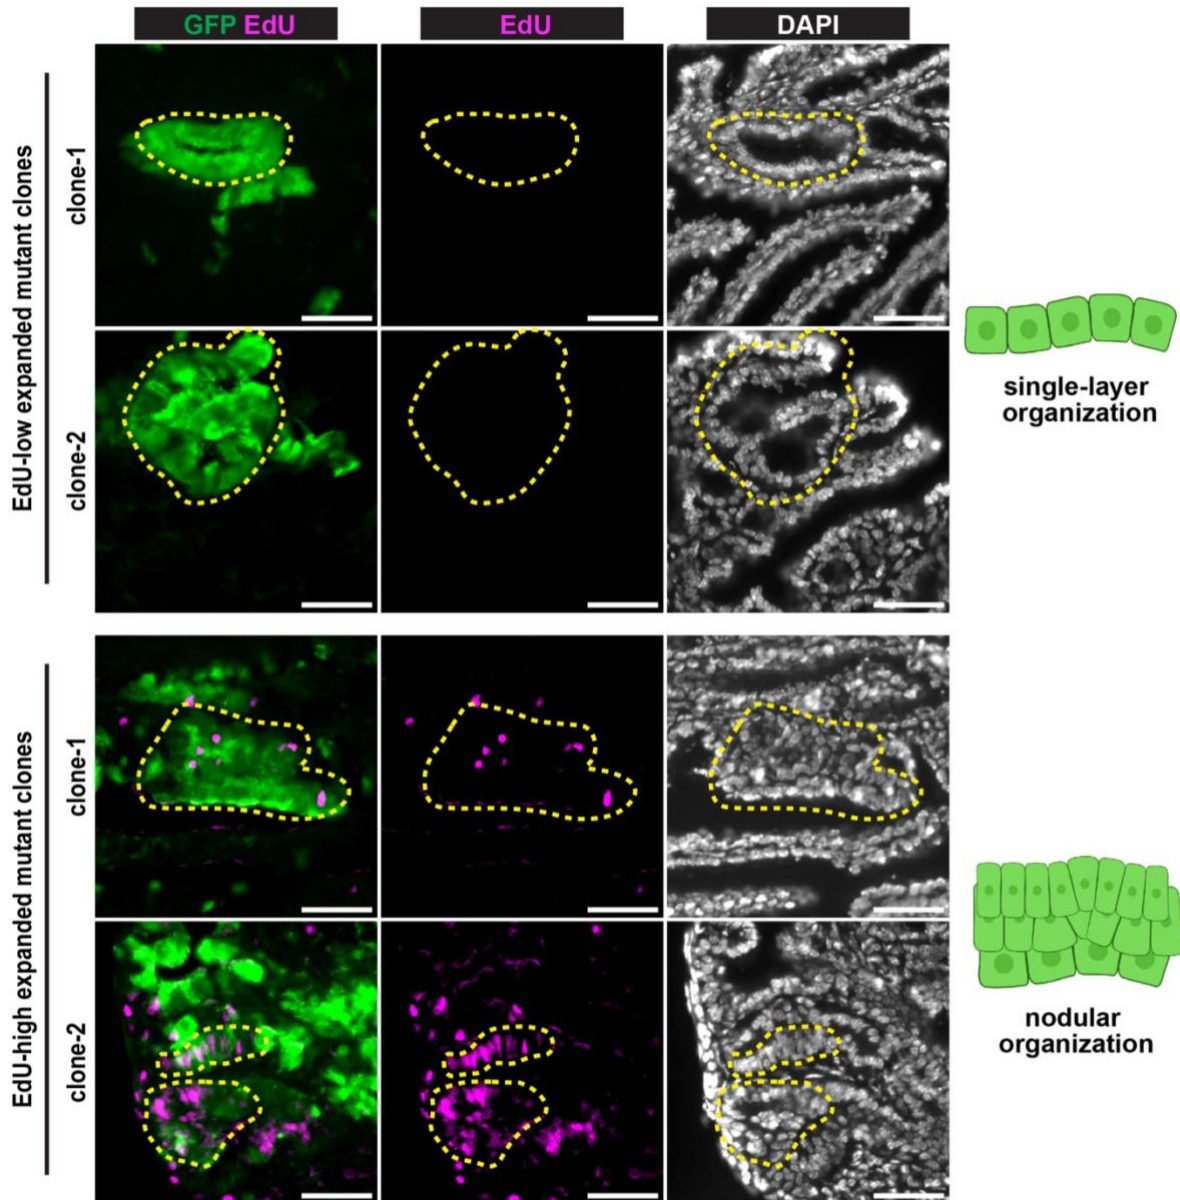

**Figure S9, related to Figure 4: Differential spatial organization of quiescent large mutant clones and proliferating large mutant clones.** While EdU<sup>-</sup> (quiescent) clones showed a single-layer organization, the EdU<sup>+</sup> (proliferating) clones showed a nodular organization. A total of 7 mice were treated with EdU in drinking water for 7 days right before harvest at 5 months old. 10 EdU<sup>+</sup> and 17 EdU<sup>-</sup> expanded mutant clones from these mice were assessed. The dashed circle indicates a region that shows single-layer (upper panel) or nodular organization (lower panel) of mutant cells. Scale bar=50 $\mu$ m.

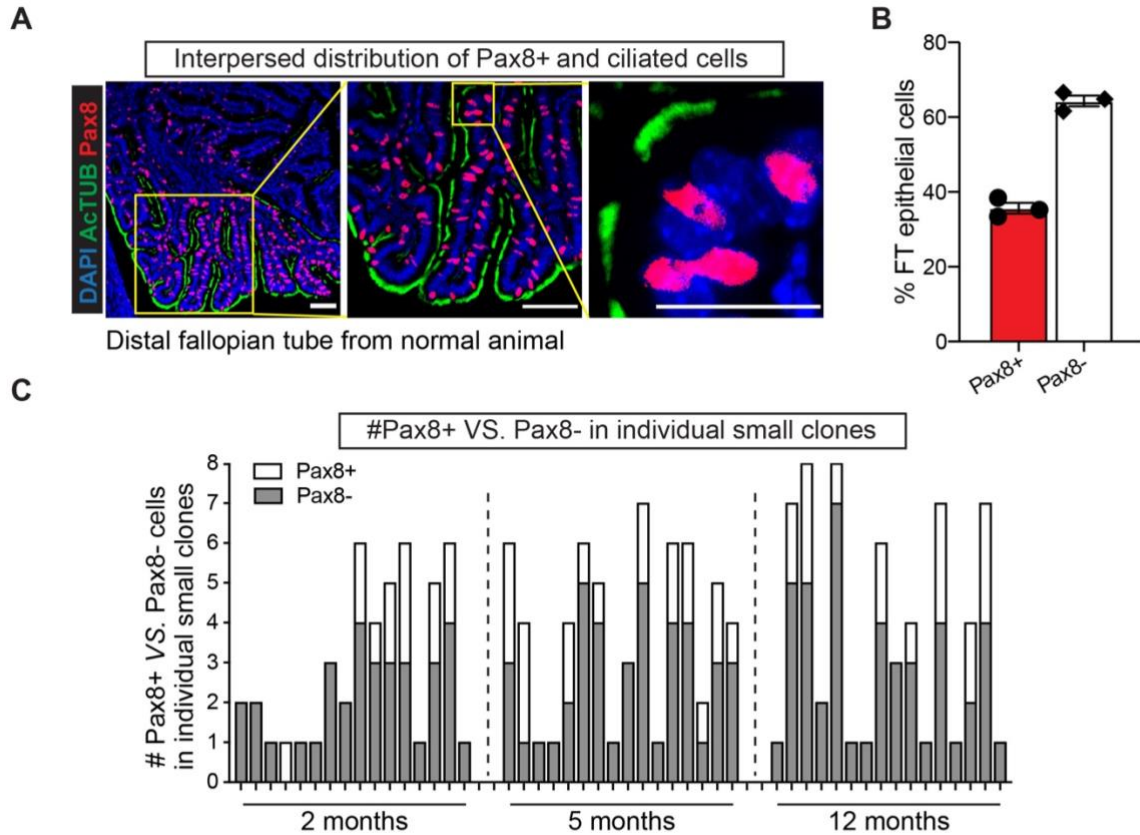

**Figure S10, related to Figure 5: The Pax8+ cell distribution pattern in wildtype distal fallopian tubes and the Pax8+% in small mutant clones over time. (A)** Alternating Pax8+ and AcTUB+ cells in the distal fallopian tubes of 5 months wildtype mice ( $n=3$ ). Scale bar=50 $\mu$ m for the left and middle panels, and 25  $\mu$ m for the right panel. **(B)** The distal fallopian tubes of a normal animal at 5 months old consists of ~70% Pax8- cells and 30% Pax8+ cells. Fallopian tubes from three 5-month-old wildtype mice were harvested and sectioned for Pax8 and AcTUB staining. Data are represented as mean  $\pm$ SEM. **(C)** Pax8+ cells account for a small portion of small mutant clones at all the indicated ages. Four mice at each age were assessed. 16 small clones of each age were plotted.

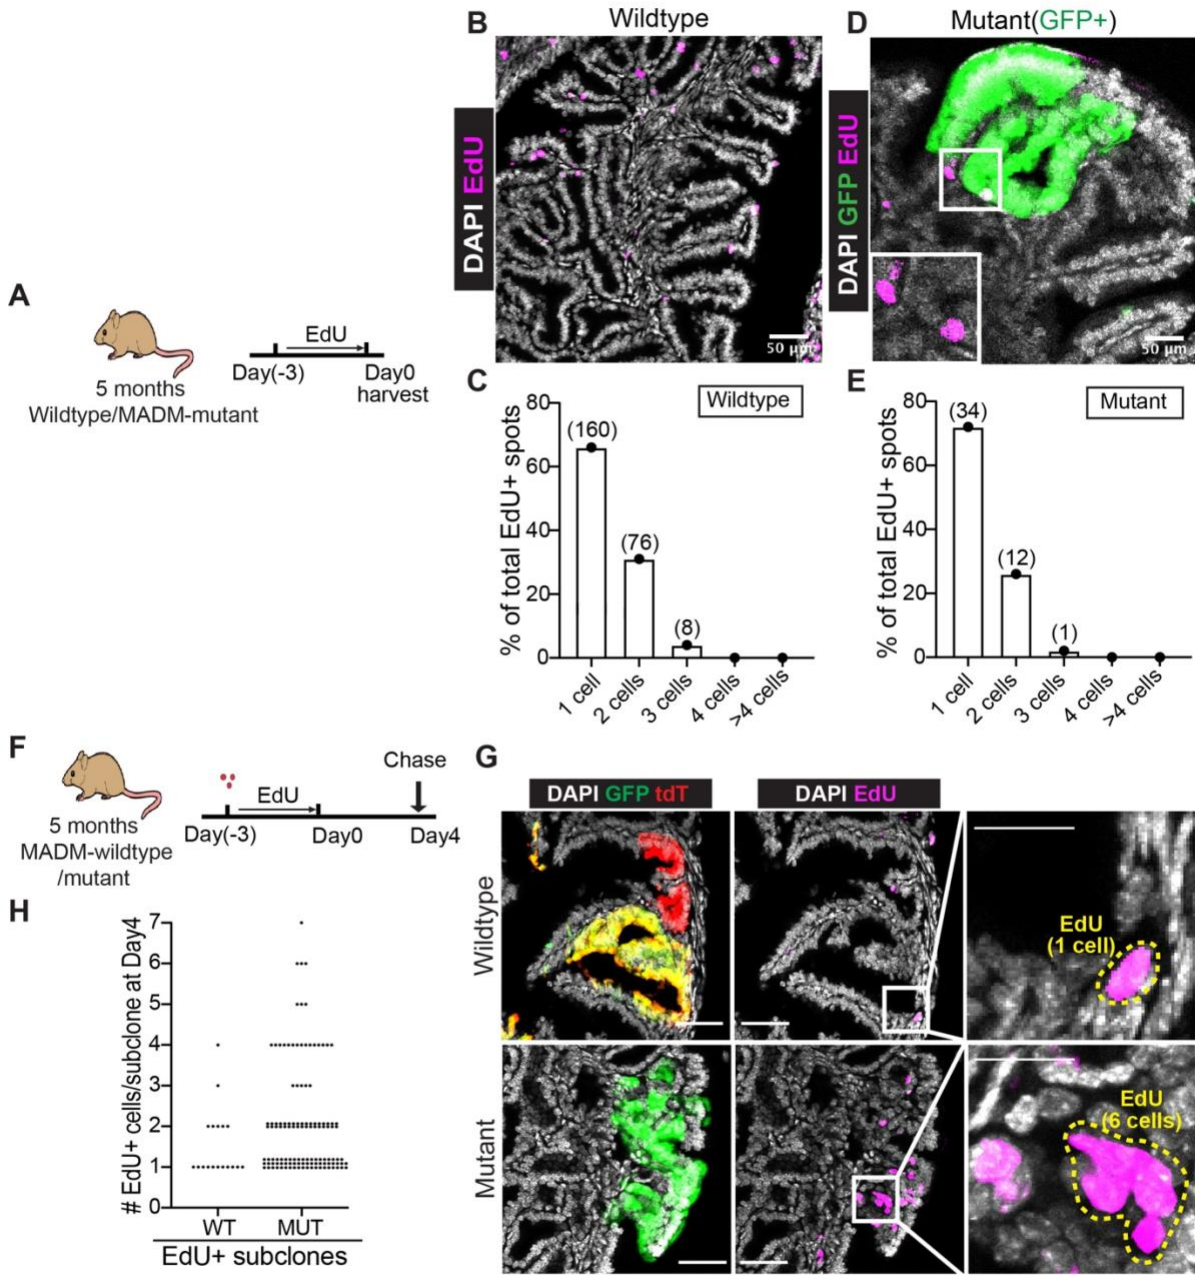

**Figure S11, related to Figure 5: 3-day EdU labeling marked proliferating wildtype/mutant fallopian tube cells at clonal density.** (A) Scheme for EdU treatment for labeling proliferating cells at clonal density. (B) EdU staining in wildtype fallopian tubes revealed that EdU-labeled cells were scattered, and most EdU+ spots were shown as one-cell or two-cell status. Scale bar=50µm. Representative image from 3 mice. (C) The size distribution of EdU+ spots in fallopian tubes from 5-month-old wildtype mice ( $n=3$ ). The total number of EdU spots ( $n$ ) is shown above the bar graph. (D) EdU staining in mutant fallopian tubes revealed that EdU-labeled cells were also scattered, and most EdU+ spots were still shown as one cell or two cells. Scale bar=50µm. Representative image from 3 mice. (E) The size distribution of all EdU+ spots in fallopian tubes from 5-month-old MADM-mutant mice ( $n=3$ ). The total number of EdU+ spots ( $n$ ) is shown above the bar graph. (F) The scheme for EdU pulse-chase assay. (G) EdU+ subclones within large wildtype/mutant clones after the EdU pulse-chase. Upper panel: an EdU+ clone of one cell within large wildtype clones. Lower panel: an EdU+ clone of six cells within large mutant clones. The dashed circle indicates a EdU+ subclone. Scale bar=20µm. (H) The size of each EdU+ clone within large wildtype clones and large mutant clones after EdU pulse-chase. A total of 18 EdU+ subclones within wildtype large clones from three MADM-wildtype mice, and 120 subclones within mutant large clones from three MADM-mutant mice at 5 months old were assessed.



**Table S1, related to Figure 3: List of differentially expressed genes between wildtype small clones and wildtype large clones, related to Figure 3D**

| Gene                               | Fold Change | p-value | Gene                               | Fold Change | p-value |
|------------------------------------|-------------|---------|------------------------------------|-------------|---------|
| <b>Upregulated in large clones</b> |             |         | <b>Upregulated in small clones</b> |             |         |
| Gm28438                            | 11.942      | 0.029   | Septin5                            | 11.802      | 0.029   |
| Gm6024                             | 9.510       | 0.010   | Gm9795                             | 11.669      | 0.030   |
| Gm7289                             | 7.015       | 0.022   | Rpl9-ps6                           | 9.240       | 0.015   |
| Tor1a                              | 6.590       | 0.087   | Edem2                              | 7.620       | 0.010   |
| Gpsm1                              | 6.050       | 0.089   | Mlycd                              | 7.172       | 0.033   |
| Frg2f1                             | 5.954       | 0.016   | Psmb2                              | 6.632       | 0.082   |
| Tyrobp                             | 5.912       | 0.015   | Otud3                              | 6.389       | 0.001   |
| Gm12713                            | 5.816       | 0.021   | Gdpd2                              | 6.295       | 0.087   |
| Me1                                | 5.529       | 0.015   | Nat8f4                             | 6.223       | 0.045   |
| Gm5637                             | 5.410       | 0.000   | U2af1l4                            | 6.204       | 0.015   |
| Mest                               | 5.280       | 0.022   | Derl3                              | 6.067       | 0.089   |
| 2610528A11Rik                      | 5.213       | 0.040   | Phax                               | 5.993       | 0.021   |
| Card11                             | 5.174       | 0.094   | Gm14418                            | 5.915       | 0.021   |
| Gm5385                             | 5.158       | 0.010   | Lrrc40                             | 5.910       | 0.016   |
| Myrf1                              | 5.128       | 0.089   | Nbl1                               | 5.885       | 0.067   |
| Eefsec                             | 4.811       | 0.030   | Agap3                              | 5.841       | 0.061   |
| Mmp19                              | 4.671       | 0.019   | Kcnk7                              | 5.786       | 0.019   |
| Map3k1                             | 4.572       | 0.032   | Cenpx                              | 5.683       | 0.100   |
| Mgme1                              | 4.559       | 0.005   | Ganab                              | 5.584       | 0.082   |
| Nme4                               | 4.506       | 0.000   | Mrm1                               | 5.571       | 0.100   |
| Gm42453                            | 4.480       | 0.054   | Sap25                              | 5.571       | 0.076   |
| Slc38a5                            | 4.471       | 0.063   | Sdr39u1                            | 5.457       | 0.016   |
| Abhd4                              | 4.377       | 0.098   | 4931428F04Rik                      | 5.420       | 0.087   |
| Siva1                              | 4.354       | 0.094   | Mob2                               | 5.419       | 0.018   |
| Kcnj3                              | 4.180       | 0.088   | Ints11                             | 5.266       | 0.015   |
| Gm9703                             | 4.007       | 0.096   | Zfp956                             | 5.206       | 0.051   |
| C1d                                | 3.836       | 0.087   | Pagr1a                             | 5.143       | 0.040   |
| Ehd3                               | 3.767       | 0.086   | Gbp8                               | 5.134       | 0.018   |
| C4b                                | 3.624       | 0.100   | Adgrg1                             | 5.113       | 0.089   |
| Gm6763                             | 3.596       | 0.100   | Col7a1                             | 5.072       | 0.076   |
| Gm8764                             | 3.596       | 0.100   | Gm15794                            | 5.046       | 0.019   |
| Cox10                              | 3.507       | 0.030   | Ndufs5                             | 5.042       | 0.087   |
| Rai2                               | 3.477       | 0.089   | Trip6                              | 4.962       | 0.094   |
| Fam186b                            | 3.432       | 0.080   | Nprl2                              | 4.904       | 0.029   |
| Dapk2                              | 3.394       | 0.100   | Gm10571                            | 4.890       | 0.021   |

|         |       |       |          |       |       |
|---------|-------|-------|----------|-------|-------|
| Cemip   | 3.388 | 0.062 | Umps     | 4.826 | 0.032 |
| Sntn    | 3.371 | 0.062 | Dydc2    | 4.825 | 0.100 |
| Mospd2  | 3.350 | 0.100 | BC024139 | 4.747 | 0.045 |
| Trdn    | 3.302 | 0.015 | Inafm1   | 4.680 | 0.045 |
| Glt1d1  | 3.268 | 0.069 | Hps1     | 4.651 | 0.079 |
| Il18r1  | 3.219 | 0.030 | Sorbs3   | 4.635 | 0.035 |
| Mmp3    | 3.111 | 0.088 | Irf7     | 4.604 | 0.100 |
| Ccdc88a | 3.099 | 0.100 | Slc39a6  | 4.581 | 0.094 |
| Vmn1r80 | 3.088 | 0.022 | Fam174c  | 4.543 | 0.067 |
| Kcnk9   | 2.950 | 0.067 | Cpn1     | 4.487 | 0.037 |
| Prdm1   | 2.947 | 0.089 | C1qtnf5  | 4.411 | 0.082 |
| Abi3bp  | 2.937 | 0.087 | Sspo     | 4.395 | 0.067 |
| Cmpk2   | 2.591 | 0.068 | Fam20a   | 4.311 | 0.032 |
|         |       |       | Nbeal2   | 4.244 | 0.099 |
|         |       |       | Mxi1     | 4.237 | 0.032 |
|         |       |       | Gm46103  | 4.154 | 0.100 |
|         |       |       | Bex1     | 4.128 | 0.030 |
|         |       |       | Nudt18   | 4.116 | 0.054 |
|         |       |       | Nudt16l1 | 4.092 | 0.034 |
|         |       |       | Pgap4    | 4.041 | 0.087 |
|         |       |       | Chaf1a   | 4.032 | 0.054 |
|         |       |       | Krt79    | 4.011 | 0.035 |
|         |       |       | Slc39a11 | 4.001 | 0.100 |
|         |       |       | Sharpin  | 3.958 | 0.087 |
|         |       |       | Gmppb    | 3.909 | 0.097 |
|         |       |       | Gbp6     | 3.723 | 0.057 |
|         |       |       | Idua     | 3.640 | 0.097 |
|         |       |       | Dlec1    | 3.613 | 0.015 |
|         |       |       | Kif17    | 3.584 | 0.022 |
|         |       |       | Zfp719   | 3.455 | 0.100 |
|         |       |       | Nono     | 3.415 | 0.015 |
|         |       |       | Orai3    | 3.318 | 0.100 |
|         |       |       | Mrps12   | 3.252 | 0.082 |
|         |       |       | Cyb561   | 3.209 | 0.100 |
|         |       |       | Sftpd    | 3.176 | 0.051 |
|         |       |       | Catip    | 3.162 | 0.087 |
|         |       |       | Cdkl1    | 3.111 | 0.030 |
|         |       |       | Mettl23  | 3.100 | 0.087 |
|         |       |       | Gnal     | 2.950 | 0.015 |

|  |  |  |        |       |       |
|--|--|--|--------|-------|-------|
|  |  |  | Hsd11  | 2.925 | 0.080 |
|  |  |  | Pdia4  | 2.901 | 0.051 |
|  |  |  | U2af1  | 2.887 | 0.027 |
|  |  |  | Rnf216 | 2.716 | 0.087 |
|  |  |  | Edn1   | 2.638 | 0.087 |
|  |  |  | Csdc2  | 2.521 | 0.048 |
|  |  |  | Fcgbp  | 2.489 | 0.051 |
|  |  |  | Fahd2a | 2.155 | 0.100 |
|  |  |  | Plec   | 2.149 | 0.087 |
|  |  |  | Myh7   | 2.037 | 0.087 |



**Table S3, related to STAR Methods: imaging and quantification details.**

| Experiment/Figure                                                                               | Description of animals used                                                                                                            | #animal used per time point /condition | #images/#clones/#Cells quantified                                                                                                                                                                                                |
|-------------------------------------------------------------------------------------------------|----------------------------------------------------------------------------------------------------------------------------------------|----------------------------------------|----------------------------------------------------------------------------------------------------------------------------------------------------------------------------------------------------------------------------------|
| Frequency of initial GFP+ mutant cells (Fig. 1C, D)                                             | MADM-mutant animal; Doxycycline P0-21; harvested at P21                                                                                | 4 mice                                 | Continuous section of whole fallopian tube (FT); slides containing GFP+ cells were selected out; 3 slides from each mouse were quantified.                                                                                       |
| Pax8 status of GFP+ cells (Fig. 1E, F)                                                          | MADM-mutant animal; Doxycycline P0-21; harvested at P21                                                                                | 3 mice                                 | Continuous section of FT; 5 GFP+ cell containing slides/mouse were stained for Pax8;181 GFP+ cells were quantified.                                                                                                              |
| Expansion of GFP+ mutant clones (Fig. 1G)                                                       | MADM-mutant animal; Doxycycline P0-21; harvested at 1, 2, 3, 5, 12 months                                                              | 3 mice                                 | Continuous section of both FTs of each mouse; All slides were reviewed; One representative image of each age was presented.                                                                                                      |
| Whole-FT-3D imaging to measure the clonal size distribution of mutant clones (Fig. 2B, C, E, F) | MADM-mutant animal; Doxycycline P0-21; harvested at 1, 2, 5 months                                                                     | 4 mice                                 | The left side FT of each mouse was used for clearing and imaging; 129 GFP+ mutant clones for 1-month-old mice, 233 for 2 months, 200 for 5 months.                                                                               |
| Whole FT 3D imaging to measure the clonal size distribution of wildtype clones (Fig. 3A, B)     | MADM-wildtype animal; Doxycycline P0-21; harvested at 1, 2, 5 months                                                                   | 3 mice                                 | The left side FT of each mouse was used; 211 clones of all colors for 1-month-old mice, 310 for 2 months, 284 for 5 months.                                                                                                      |
| Laser capture micro-dissection of small and large clones (Fig. 3C)                              | MADM-wildtype animal; Doxycycline P0-21; harvested at 1 month                                                                          | 6 mice                                 | From each mouse, ~200 cells from small clones and 200 cells from large clones were isolated separately.                                                                                                                          |
| EdU-based proliferation assay at clonal level (Fig. 4A, B)                                      | MADM-mutant and MADM-wildtype animal; Doxycycline P0-21; harvested at 1, 2, 5 months; EdU in drinking water for 7 days before harvest. | 3 mice                                 | Continuous section of both FTs of each mouse; All slides were stained for EdU and imaged. Wildtype large clones imaged 17(1month),20(2 months), 35(5 months); mutant large clones imaged 17(1month), 12(2 months), 20(5 months). |
| Persistence of wildtype and mutant large clones (Fig. 4F)                                       | MADM-mutant and MADM-wildtype animal; Doxycycline P0-21; harvested at 1, 2, 5 months.                                                  | 4 mice                                 | The left side FT of each mouse was used for continuous cutting. All slides were imaged and reviewed to quantify the number of GFP+ or RFP+ large clones/FT.                                                                      |
| Pax8 status of mutant small and large clones (Fig. 5A)                                          | MADM-mutant animal; Doxycycline P0-21; harvested at 2, 5, 12 months.                                                                   | 4 mice                                 | Continuous section of both FTs of each mouse; All slides were stained and imaged for Pax8; #clones quantified: 2 months (small=23; large=8), 5 months (small=24; large=15), 12 months (small=15; large=11).                      |

| Experiment/Figure                                                                                 | Description of animal used                                                                                                       | # animal used per time point /condition | #Images/#clones/#Cells quantified                                                                                                                                                                                               |
|---------------------------------------------------------------------------------------------------|----------------------------------------------------------------------------------------------------------------------------------|-----------------------------------------|---------------------------------------------------------------------------------------------------------------------------------------------------------------------------------------------------------------------------------|
| Distribution pattern of Pax8+ cells in large mutant clones and adjacent regions (Fig. 5C)         | MADM-mutant animal; Doxycycline P0-21; harvested at 5 months.                                                                    | 3 mice                                  | Continuous section of both FTs of each mouse; All slides were stained for Pax8 and imaged; The Pax8+% of 10 mutant clones that contain continuous stretch of Pax8+ cells and their adjacent non-mutant regions were quantified. |
| EdU pulse-chase assay to analyze the fate of proliferating cells in large mutant clones (Fig. 5F) | MADM-mutant animal; Doxycycline P0-21; harvested at 5 months; EdU in drinking water for 3 days: Day (-7) to (-5) before harvest. | 6 mice                                  | Continuous section of both FTs of each mouse; All slides were stained for cilia(AcTUB), EdU and imaged; 18 EdU+ subclones with $\geq 4$ cells were quantified for cilia status.                                                 |
